# Supplementary material for: Identification of a queen and king recognition pheromone in the subterranean termite Reticulitermes flavipes
Source: PubMed Central journal article supplement — Proc Natl Acad Sci U S A. 2018 Mar 19;115(15):3888–93. doi: 10.1073/pnas.1721419115 (PMC5899469; doi:10.1073/pnas.1721419115), 2018-03-19
Supplement: pnas.201721419SI.pdf [file pnas.201721419SI.pdf]

# Supporting Information

Funaro et al. 10.1073/pnas.1721419115

**Table S1. CHCs of *R. flavipes* workers, queens, and kings**

| Peak no.* | Hydrocarbon <sup>†</sup>                        | Kovats index | Workers (n = 57)      |        |            |            | Neotenic queens (n = 7) |        |             |            | Neotenic kings (n = 7) |        |             |            |
|-----------|-------------------------------------------------|--------------|-----------------------|--------|------------|------------|-------------------------|--------|-------------|------------|------------------------|--------|-------------|------------|
|           |                                                 |              | Total, % <sup>‡</sup> | SEM, % | ng         | SEM, ng    | Total, %                | SEM, % | ng          | SEM, ng    | Total, %               | SEM, % | ng          | SEM, ng    |
| 1         | Heneicosane                                     | 2100         | 0.0                   | 0.0    | <b>0.0</b> | <b>0.0</b> | 2.7                     | 0.7    | <b>32.0</b> | <b>8.1</b> | 1.2                    | 0.2    | <b>14.2</b> | <b>2.8</b> |
| 2         | Tricosane                                       | 2301         | 7.7                   | 0.2    | 23.2       | 0.6        | 9.3                     | 0.7    | 111.6       | 8.1        | 12.2                   | 2.0    | 144.0       | 24.0       |
| 3         | 11-Methyltricosane                              | 2336         | 0.7                   | 0.0    | 2.2        | 0.1        | 1.5                     | 0.2    | 18.3        | 3.0        | 1.8                    | 0.1    | 21.1        | 1.7        |
| 4         | Tetracosane                                     | 2400         | 5.5                   | 0.1    | 16.7       | 0.3        | 3.4                     | 0.5    | 41.2        | 5.8        | 3.1                    | 0.3    | 36.2        | 4.0        |
| 5         | 12- and 11-Methyltetracosane                    | 2435         | 0.9                   | 0.0    | 2.8        | 0.1        | 1.3                     | 0.2    | 15.8        | 1.9        | 1.5                    | 0.1    | 18.0        | 1.2        |
| 6         | 2-Methyltetracosane                             | 2464         | 9.5                   | 0.2    | 28.7       | 0.5        | 7.1                     | 0.8    | 85.1        | 9.5        | 7.7                    | 0.8    | 91.5        | 9.1        |
| 7         | 3-Methyltetracosane and pentacosene             | 2476         | 3.0                   | 0.2    | 9.1        | 0.5        | 1.7                     | 0.4    | 20.6        | 4.5        | 1.7                    | 0.4    | 20.6        | 5.2        |
| 8         | Pentacosane                                     | 2501         | 30.2                  | 0.9    | 91.1       | 2.7        | 14.1                    | 2.5    | 169.7       | 30.3       | 14.0                   | 1.1    | 166.0       | 12.7       |
| 9         | 13- and 11-Methylpentacosane                    | 2535         | 12.9                  | 0.3    | 39.0       | 1.0        | 15.5                    | 1.3    | 186.2       | 15.5       | 18.9                   | 1.0    | 224.0       | 11.8       |
| 10        | Pentacosadiene                                  | 2549         | 3.6                   | 0.2    | 11.0       | 0.5        | 4.9                     | 1.0    | 58.9        | 12.2       | 4.8                    | 0.7    | 57.1        | 7.7        |
| 11        | 2-Methylpentacosane and pentacosadiene          | 2563         | 5.9                   | 0.1    | 17.8       | 0.3        | 2.9                     | 0.4    | 34.9        | 4.7        | 3.6                    | 0.5    | 42.4        | 5.4        |
| 12        | 3-Methylpentacosane                             | 2574         | 5.3                   | 0.2    | 16.0       | 0.5        | 3.2                     | 0.5    | 37.9        | 6.2        | 3.5                    | 0.6    | 40.9        | 6.6        |
| 13        | Pentacosatriene                                 | 2610         | 4.4                   | 0.2    | 13.4       | 0.6        | 2.1                     | 0.4    | 25.5        | 4.9        | 2.4                    | 0.3    | 28.2        | 3.6        |
| 14        | Heptacosane                                     | 2700         | 0.4                   | 0.0    | 1.1        | 0.0        | 0.2                     | 0.0    | 2.3         | 0.2        | 0.2                    | 0.0    | 2.2         | 0.2        |
| 15        | Octacosane <sup>§</sup>                         | 2800         | NA                    | NA     | NA         | NA         | NA                      | NA     | NA          | NA         | NA                     | NA     | NA          | NA         |
| 16        | Hentriacontane                                  | 3100         | 0.6                   | 0.1    | 1.7        | 0.4        | 3.5                     | 1.8    | 42.4        | 21.9       | 2.9                    | 1.4    | 34.0        | 17.1       |
| 17        | 13- and 11-Methylpentatriacontane               | 3525         | 2.3                   | 0.1    | 7.0        | 0.3        | 5.7                     | 2.2    | 69.1        | 25.9       | 4.5                    | 1.5    | 52.9        | 17.3       |
| 18        | 13-, 12-, and 11-Methylhexatriacontane          | 3622         | 1.2                   | 0.3    | 3.7        | 0.8        | 1.5                     | 0.2    | 17.9        | 2.4        | 1.3                    | 0.2    | 15.0        | 2.7        |
| 19        | 13- and 11-Methylheptatriacontane               | 3723         | 2.5                   | 0.1    | 7.4        | 0.3        | 10.0                    | 1.4    | 120.2       | 16.8       | 7.3                    | 0.8    | 86.4        | 9.1        |
| 20        | 11,15-Dimethylheptatriacontane                  | 3745         | 1.3                   | 0.1    | 4.1        | 0.3        | 3.1                     | 0.6    | 37.8        | 7.3        | 2.4                    | 0.2    | 28.9        | 1.8        |
| 21        | 15-, 13-, and 11-Methylnonatriacontane          | 3922         | 1.3                   | 0.1    | 3.9        | 0.2        | 4.2                     | 0.5    | 50.4        | 6.4        | 3.4                    | 0.5    | 40.2        | 5.4        |
| 22        | 11,15-Dimethylnonatriacontane                   | 3944         | 0.7                   | 0.1    | 2.2        | 0.2        | 2.0                     | 0.3    | 24.2        | 3.2        | 1.6                    | 0.1    | 18.4        | 1.0        |
|           | Average total mass of 21 CHCs <sup>¶</sup> , ng |              | 100                   |        | 302        |            | 100                     |        | 1,202       |            | 100                    |        | 1,182       |            |

Values in the ng column represent the average mass of each hydrocarbon per termite. Bold type indicates reproductive-specific compounds found in our extracts. NA, not applicable as this was our internal standard.

\*Peak numbers correspond to peaks labeled in Fig. 1. The 21 peaks were selected by setting a 1% threshold for representation in the total area integrated in the chromatograms.

<sup>†</sup>The double-bond positions in mono-, di-, and trialkenes were not determined.

<sup>‡</sup>Values in the Total column represent the average percentage of the total chromatogram area for the 21 compounds from the cuticular extracts of *R. flavipes* workers, queens, and kings.

<sup>§</sup>Octacosane (n-C28) was used as internal standard and did not naturally occur in any sample.

<sup>¶</sup>Average total mass calculated from the integrated area of 21 extracted peaks in relation to the internal standard using 48 workers, 4 queens, and 4 kings. Some samples were omitted because they were not spiked with the internal standard.

## Primary Queen Recognition

**Movie S1.** Worker responses to an *R. flavipes* primary queen. The queen elicits rapid lateral and longitudinal shaking behavior and increased antennation from workers.

[Movie S1](#)

## Neotenic Queen Recognition

**Movie S2.** Worker responses to an *R. flavipes* neotenic queen. The neotenic queen elicits rapid lateral and longitudinal shaking behavior and increased antennation from workers.

[Movie S2](#)

## Neotenic Queen Recognition: Slow motion

**Movie S3.** Worker responses to an *R. flavipes* neotenic queen—slow motion. Slowed video of the lateral and longitudinal shaking behavior and increased antennation elicited from workers by a neotenic queen.

[Movie S3](#)

## Reaction to dummy treated with worker extract

**Movie S4.** Worker responses to a control glass dummy treated with worker extract. The glass dummy was treated with the extract of six workers in 20  $\mu$ L of hexane. Hexane was allowed to evaporate before the assay was initiated. No lateral and longitudinal shaking behavior is elicited from workers by the glass dummy.

[Movie S4](#)

## Reaction to dummy treated with worker extract & n-C21

**Movie S5.** Worker responses to a glass dummy treated with worker extract and heneicosane. The glass dummy was treated with the extract of six workers and 0.1  $\mu\text{g}$  of *n*-C21 in 20  $\mu\text{L}$  of hexane. Hexane was allowed to evaporate before the assay was initiated. The dummy elicited lateral and longitudinal shaking behavior and increased antennation from workers.

[Movie S5](#)
